# Supplementary material for: Multi-factor study of the effects of a trace amount of water vapor on low concentration CO2 capture by 5A zeolite particles
Source: Royal Society of Chemistry journal article supplement (doi:10.1039/c9ra08334k), 2020-01-01
Supplement: c9ra08334k1.pdf [file c9ra08334k1.pdf]

**Multi-factor study of the effects of a trace amount of water vapor on the low concentration CO<sub>2</sub> capture by 5A zeolite particle**

Hui Wang<sup>a</sup>, Ying Yin<sup>b</sup>, Jun-qiang Bai<sup>a\*</sup>, Shi-feng Wang<sup>c</sup>

<sup>a</sup>School of Aeronautics, Northwestern Polytechnical University, Xi'an, Shaanxi 710072, China

<sup>b</sup>MOE Key Laboratory of Thermo-Fluid Science and Engineering, School of Energy and Power Engineering, Xi'an Jiaotong University, Xi'an, Shaanxi 710049, China

<sup>c</sup>School of Engineering, Newcastle University, Newcastle, UK, NE1 7RU

\*Corresponding Author: junqiang@nwpu.edu.cn

Table S1 L-J and particle charges of 5A zeolite and CO<sub>2</sub>, N<sub>2</sub> and water molecule

(a) L-J parameters of 5A zeolite and CO<sub>2</sub>, N<sub>2</sub> and water molecule

| Atom              | Atom              | $\sigma(\text{Å})$ | $\varepsilon/k_B(K)$ |
|-------------------|-------------------|--------------------|----------------------|
| O_zeolite         | C_CO <sub>2</sub> | 3.193              | 29.116               |
| O_zeolite         | O_CO <sub>2</sub> | 3.067              | 23.433               |
| Na                | C_CO <sub>2</sub> | 2.827              | 66.778               |
| Na                | O_CO <sub>2</sub> | 2.707              | 54.762               |
| Ca                | C_CO <sub>2</sub> | 2.944              | 96.932               |
| Ca                | O_CO <sub>2</sub> | 2.833              | 77.152               |
| Al                | C_CO <sub>2</sub> | 3.366              | 32.215               |
| Al                | O_CO <sub>2</sub> | 3.246              | 25.323               |
| Si                | C_CO <sub>2</sub> | 3.620              | 49.754               |
| Si                | O_CO <sub>2</sub> | 3.494              | 38.900               |
| C_CO <sub>2</sub> | C_CO <sub>2</sub> | 2.757              | 28.129               |
| O_CO <sub>2</sub> | O_CO <sub>2</sub> | 3.033              | 80.507               |
| O_CO <sub>2</sub> | C_CO <sub>2</sub> | 2.895              | 47.588               |
| O_zeolite         | O_TIP4P           | 3.421              | 51.734               |
| Al                | O_TIP4P           | 3.613              | 56.948               |
| Si                | O_TIP4P           | 3.887              | 87.850               |
| Ca                | O_TIP4P           | 3.157              | 171.814              |
| Na                | O_TIP4P           | 3.024              | 119.146              |
| O_zeolite         | H_TIP4P           | 0                  | 0                    |
| Al                | H_TIP4P           | 0                  | 0                    |
| Si                | H_TIP4P           | 0                  | 0                    |
| Ca                | H_TIP4P           | 0                  | 0                    |
| Na                | H_TIP4P           | 0                  | 0                    |
| O_zeolite         | L_TIP4P           | 0                  | 0                    |
| Al                | L_TIP4P           | 0                  | 0                    |
| Si                | L_TIP4P           | 0                  | 0                    |
| Ca                | L_TIP4P           | 0                  | 0                    |
| Na                | L_TIP4P           | 0                  | 0                    |
| O_TIP4P           | O_TIP4P           | 3.154              | 78.021               |
| L_TIP4P           | O_TIP4P           | 0                  | 0                    |

|                  |                   |          |             |
|------------------|-------------------|----------|-------------|
| H_TIP4P          | O_TIP4P           | 0        | 0           |
| L_TIP4P          | L_TIP4P           | 0        | 0           |
| L_TIP4P          | H_TIP4P           | 0        | 0           |
| H_TIP4P          | H_TIP4P           | 0        | 0           |
| O_zeolite        | N_N <sub>2</sub>  | 3.305    | 43.68065934 |
| Al               | N_N <sub>2</sub>  | 2.805    | 28.14249456 |
| Si               | N_N <sub>2</sub>  | 2.805    | 28.14249456 |
| Ca               | N_N <sub>2</sub>  | 3.16908  | 65.66259209 |
| Na               | N_N <sub>2</sub>  | 2.983775 | 23.31260603 |
| N_N <sub>2</sub> | N_N <sub>2</sub>  | 3.31     | 36          |
| O_zeolite        | N_com             | 0        | 0           |
| Al               | N_com             | 0        | 0           |
| Si               | N_com             | 0        | 0           |
| Ca               | N_com             | 0        | 0           |
| Na               | N_com             | 0        | 0           |
| N_com            | N_com             | 0        | 0           |
| N_com            | N_N <sub>2</sub>  | 0        | 0           |
| N_N <sub>2</sub> | O_CO <sub>2</sub> | 3.1715   | 53.8354158  |
| N_N <sub>2</sub> | C_CO <sub>2</sub> | 3.0335   | 31.82206781 |
| N_com            | O_CO <sub>2</sub> | 0        | 0           |
| N_com            | C_CO <sub>2</sub> | 0        | 0           |
| O_TIP4P          | O_CO <sub>2</sub> | 2.9555   | 46.847      |
| O_TIP4P          | C_CO <sub>2</sub> | 3.0935   | 79.254      |
| H_TIP4P          | O_CO <sub>2</sub> | 0        | 0           |
| H_TIP4P          | C_CO <sub>2</sub> | 0        | 0           |
| L_TIP4P          | O_CO <sub>2</sub> | 0        | 0           |
| L_TIP4P          | C_CO <sub>2</sub> | 0        | 0           |
| O_TIP4P          | N_N <sub>2</sub>  | 3.232    | 52.99769806 |
| H_TIP4P          | N_N <sub>2</sub>  | 0        | 0           |
| L_TIP4P          | N_N <sub>2</sub>  | 0        | 0           |
| O_TIP4P          | N_com             | 0        | 0           |
| H_TIP4P          | N_com             | 0        | 0           |
| L_TIP4P          | N_com             | 0        | 0           |

(b) Particle charges of 5A zeolite structure and CO<sub>2</sub> molecule

|           |         |         |         |                  |        |                   |                   |
|-----------|---------|---------|---------|------------------|--------|-------------------|-------------------|
| Atom      | Si      | Na      | Al      | O_zeolite        | Ca     | C_CO <sub>2</sub> | O_CO <sub>2</sub> |
| Charge(e) | 2.2124  | 0.9887  | 2.0833  | -1.298           | 1.7166 | 0.6512            | -0.3256           |
| Atom      | O_TIP4P | H_TIP4P | L_TIP4P | N_N <sub>2</sub> | N_com  |                   |                   |
| Charge(e) | 0       | 0.52    | -1.04   | -0.4048          | 0.8096 |                   |                   |

Table S2 Simulation parameters <sup>1</sup>

| Property  | Formula                                                                                                                                                                                                       | values                                                                                                          |
|-----------|---------------------------------------------------------------------------------------------------------------------------------------------------------------------------------------------------------------|-----------------------------------------------------------------------------------------------------------------|
| $Z$       | $Z^3 - \left(1 - \frac{bp}{RT}\right)Z^2 + \left(\frac{ap}{R^2T^2} - 3\frac{b^2p^2}{R^2T^2} - 2\frac{bp}{RT}\right)Z - \left(\frac{abp^2}{R^2T^2} - \frac{b^2p^2}{R^2T^2} - \frac{b^3p^3}{R^3T^3}\right) = 0$ | –                                                                                                               |
| $a$       | $a = 0.45724 \frac{R^2T_c^2}{p_c} \left[1 + (0.37464 + 1.54226\omega - 0.26992\omega^2)(1 - T_c^{0.5})\right]^2$                                                                                              | –                                                                                                               |
| $b$       | $b = 0.07779 \frac{RT_c}{p_c}$                                                                                                                                                                                | –                                                                                                               |
| $\Lambda$ | $\Lambda = \sqrt{\frac{h^2}{2\pi mkT}}$                                                                                                                                                                       | $h = 6.626 \times 10^{-34}$ J.s<br>$m_{CO_2} = 7.307 \times 10^{-26}$ kg<br>$m_{N_2} = 3.32 \times 10^{-27}$ kg |

### References

- (1) D.Y. Peng and D. B. Robinson, A new two-constant equation of state, Ind. Eng. Chem. Fundam. 1976, **15**, 59-64.
